# Supplementary material for: Methodology for Lidar Monitoring of Biomass Burning Smoke in Connection with the Land Cover
Source: MDPI journal article supplement (doi:10.3390/rs14194734), 2022-09-22
Supplement: s1 [file s1]

**Supplementary Materials for**  
**"Methodology for lidar monitoring of biomass burning**  
**smoke in connection with the land cover "**

**Mariana Adam <sup>1,\*</sup>, Konstantinos Fragkos <sup>1,3</sup>, Stavros Solomos <sup>2</sup>, Livio Belegante <sup>1</sup>, Simona Andrei <sup>1</sup>,  
Camelia Talianu<sup>1</sup>, Luminița Mărmureanu <sup>1</sup>, Bogdan Antonescu <sup>1</sup>, Dragos Ene <sup>3</sup>, Victor Nicolae <sup>1</sup> and  
Vassilis Amiridis <sup>3</sup>**

<sup>1,\*</sup> National Institute of Research and Development for Optoelectronics, Romania

<sup>2</sup> Research Centre for Atmospheric Physics and Climatology, Academy of Athens, 10679  
Athens, Greece

<sup>3</sup> ERATOSTHENES Centre of Excellence, Limassol, Cyprus

<sup>4</sup> National Observatory of Athens, Greece

\* Correspondence: [mariana.adam@inoe.ro](mailto:mariana.adam@inoe.ro)

Submitted to Remote Sensing for the Special Issue entitled

**" Lidar for Advanced Classification and Retrieval of Aerosols"**

**Contents of this file**

- Figures S1-S15

(a)

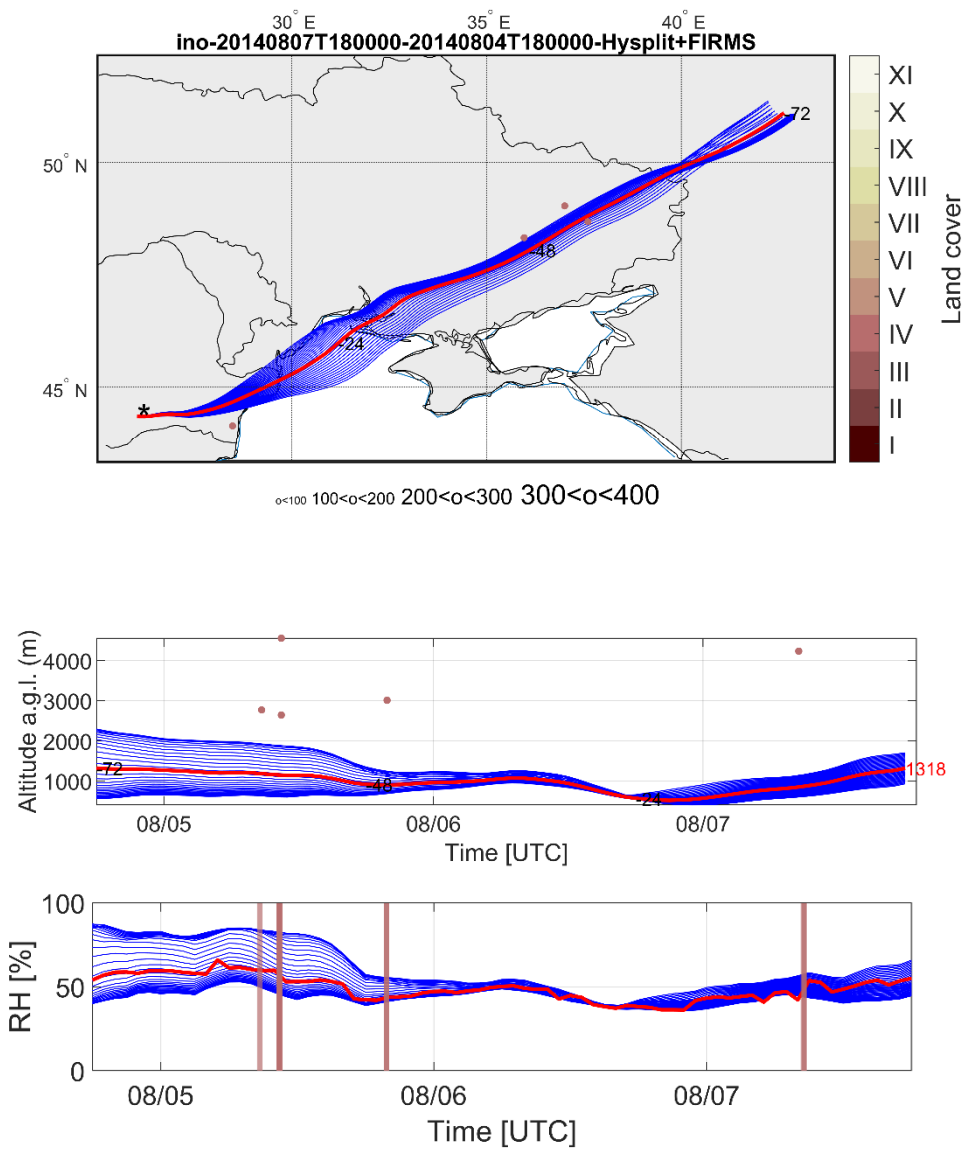

(b)

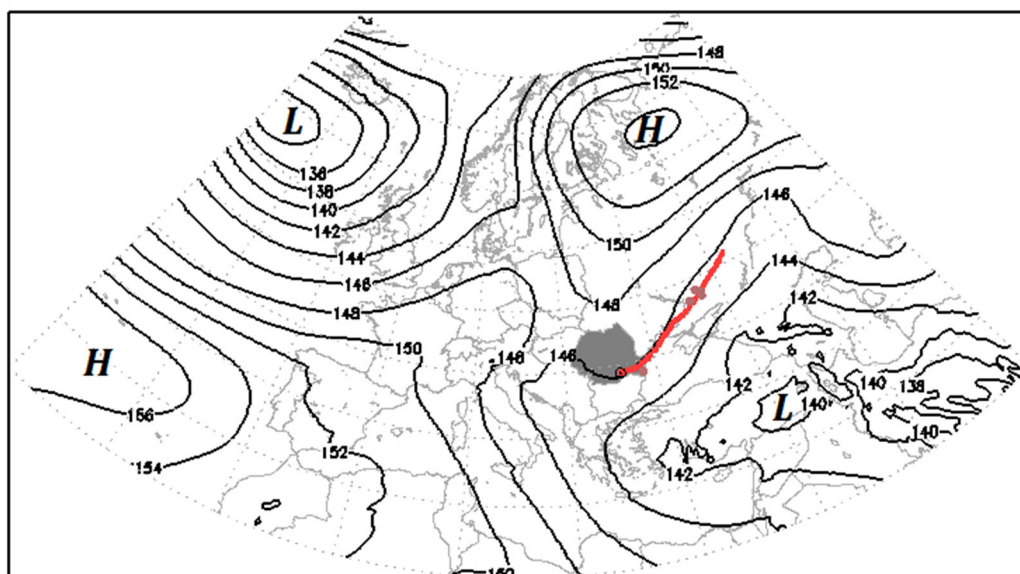

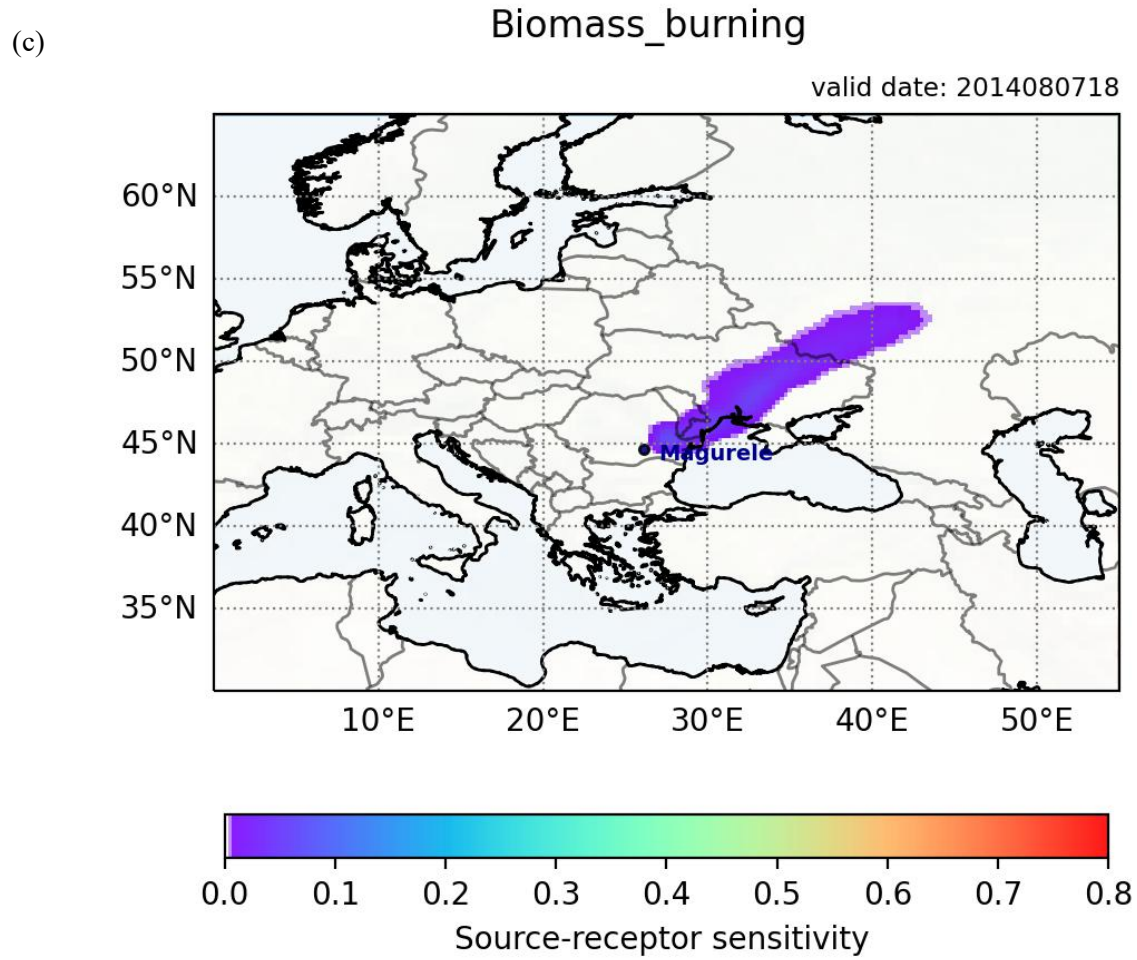

Figure S1. Case: 20140807 18:00 UTC for the layer located at 930 m - 1705 m. (a) Ensemble and mean HYSPLIT backtrajectories; The middle plot shows the trajectories altitudes versus time. The brown dots represent the fires' locations (upper plot) and their injection height (middle plot). The lower plot shows RH for both ensemble and mean trajectories. The location of the fires is shown by bars; (b) ERA5 reanalysis and (c) FEXPART source-receptor sensitivity map.

(a)

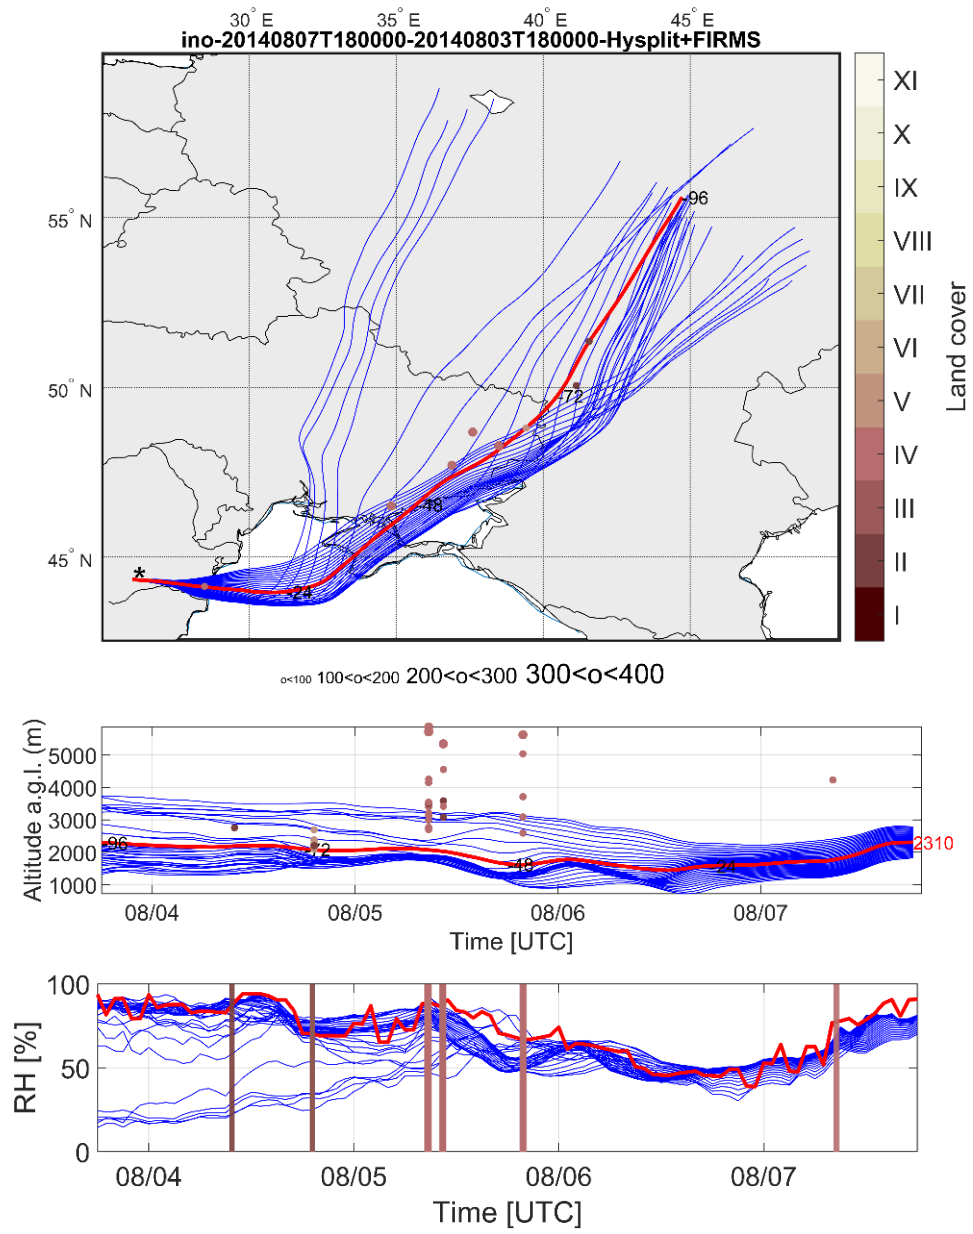



(b)

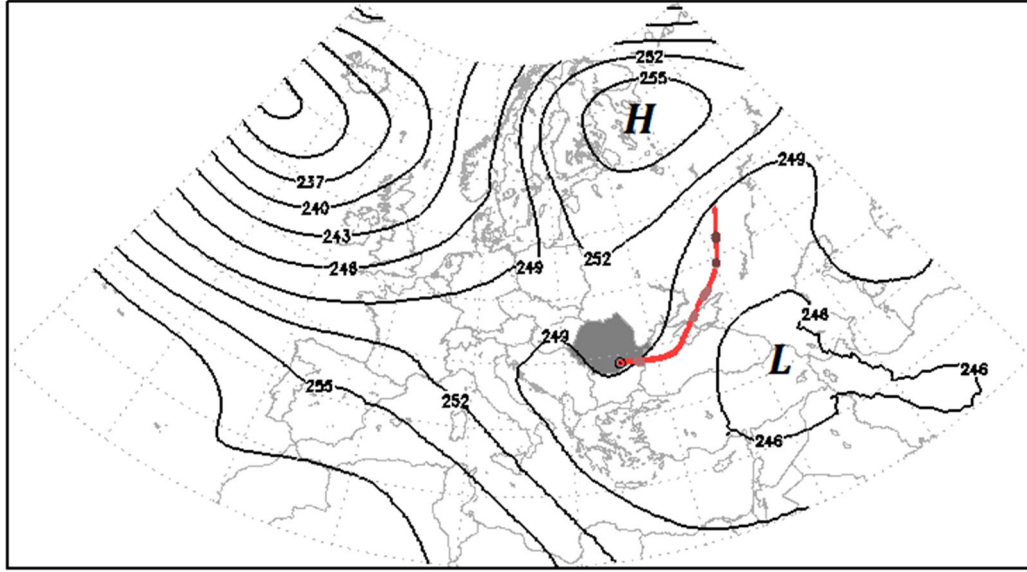

(c)

Biomass\_burning

valid date: 2014080718

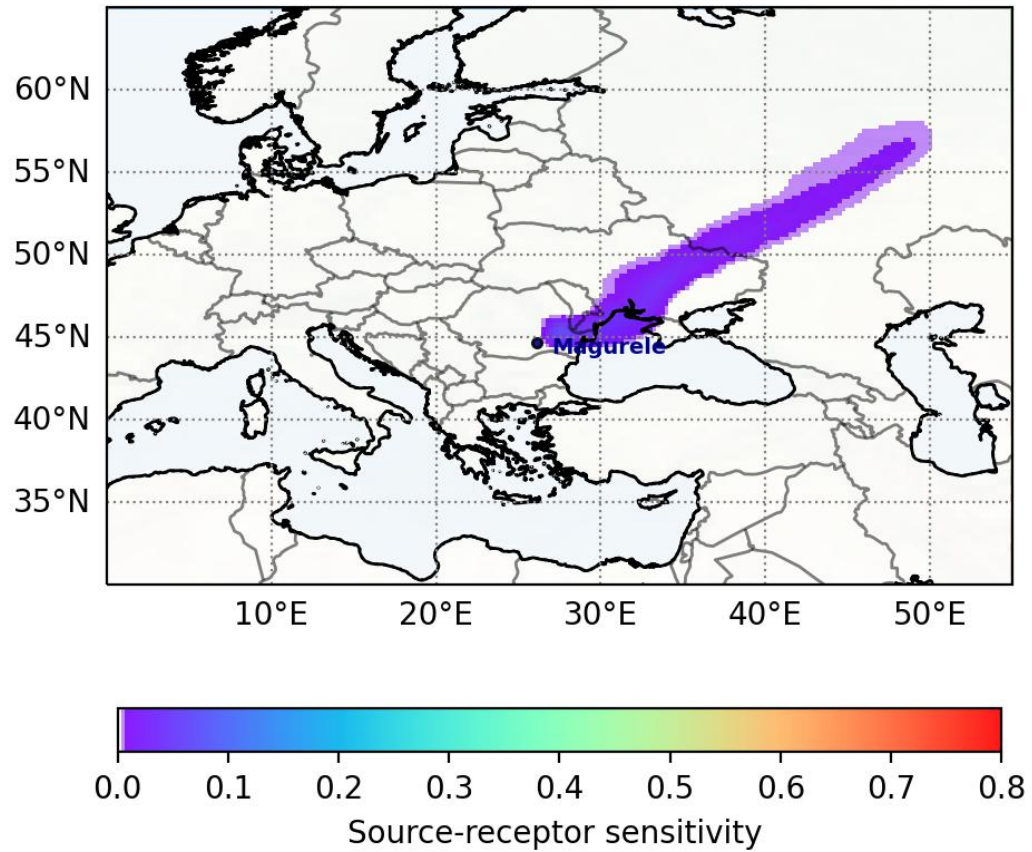

Figure S2. Case: 20140807 18:00 UTC for the layer located at 1830 m - 2790 m. (a) Ensemble and mean HYSPLIT backtrajectories; The middle plot shows the trajectories altitudes versus time. The brown dots represent the fires' locations (upper plot) and their injection height (middle plot). The lower plot shows RH for both ensemble and mean trajectories. The location of the fires is shown by bars; (b) ERA5 reanalysis and (c) FEXPART source-receptor sensitivity map.

(a)

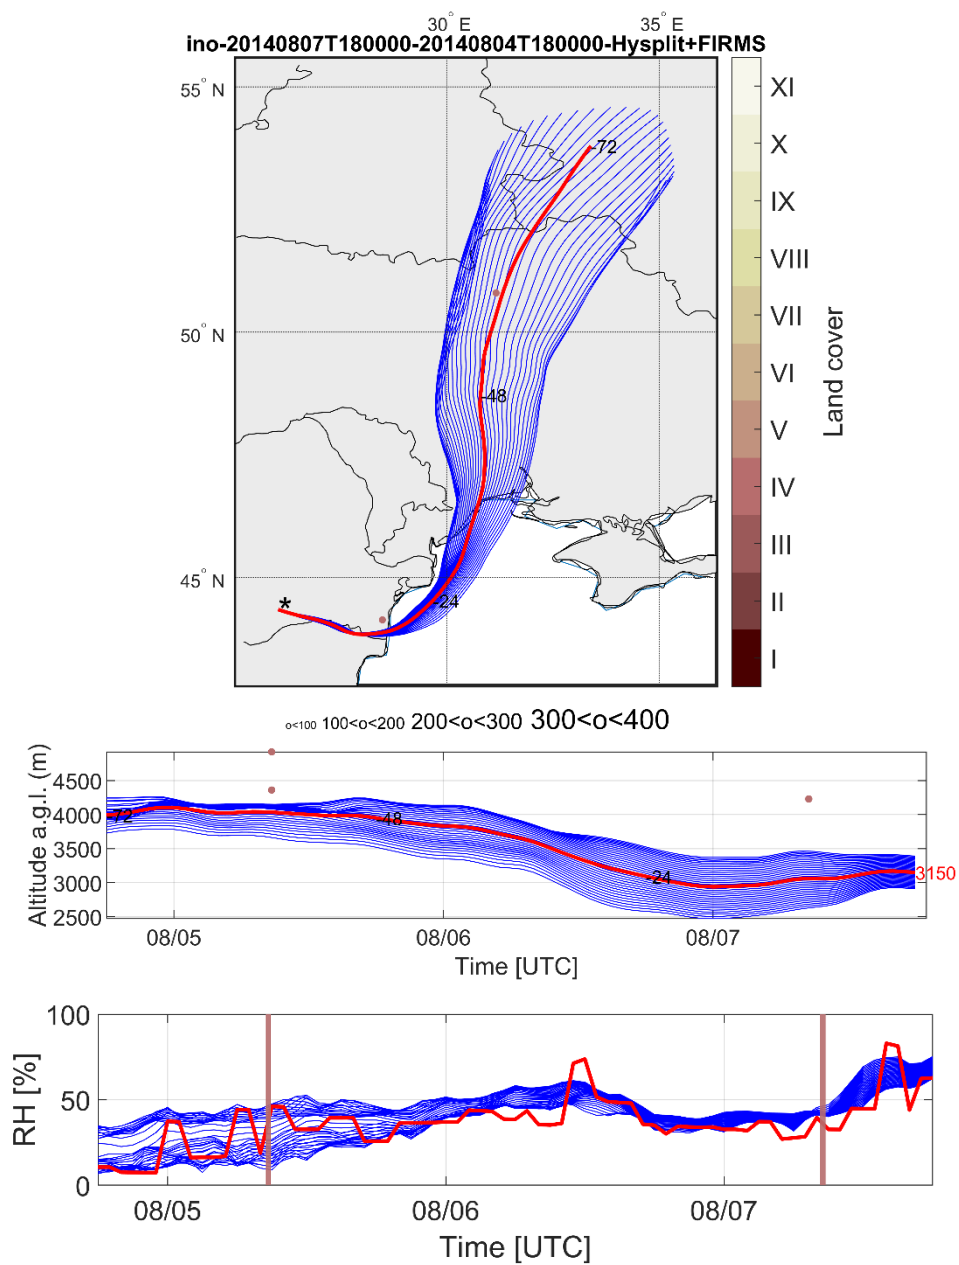

(b)

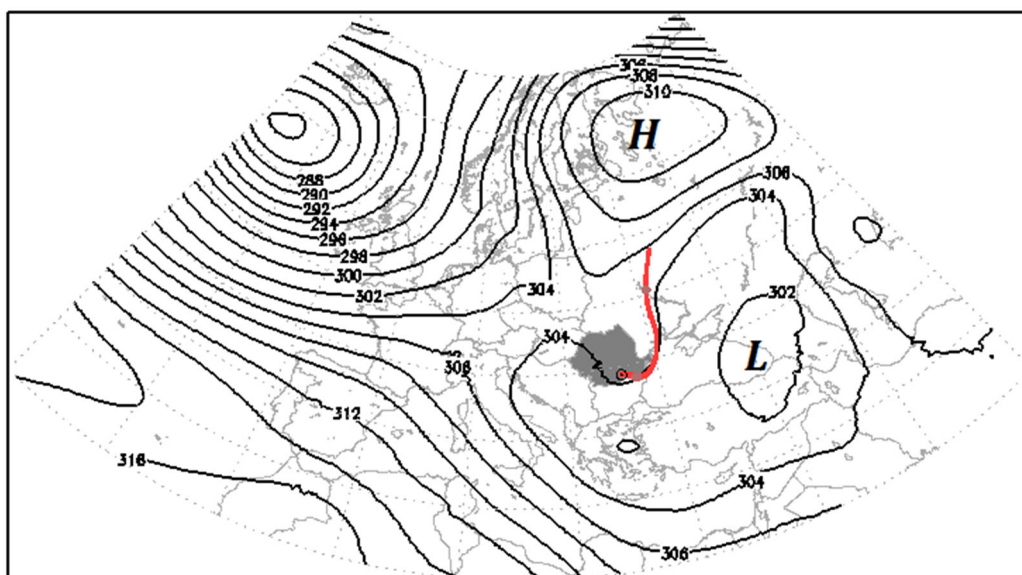

(c)

Biomass\_burning

valid date: 2014080718

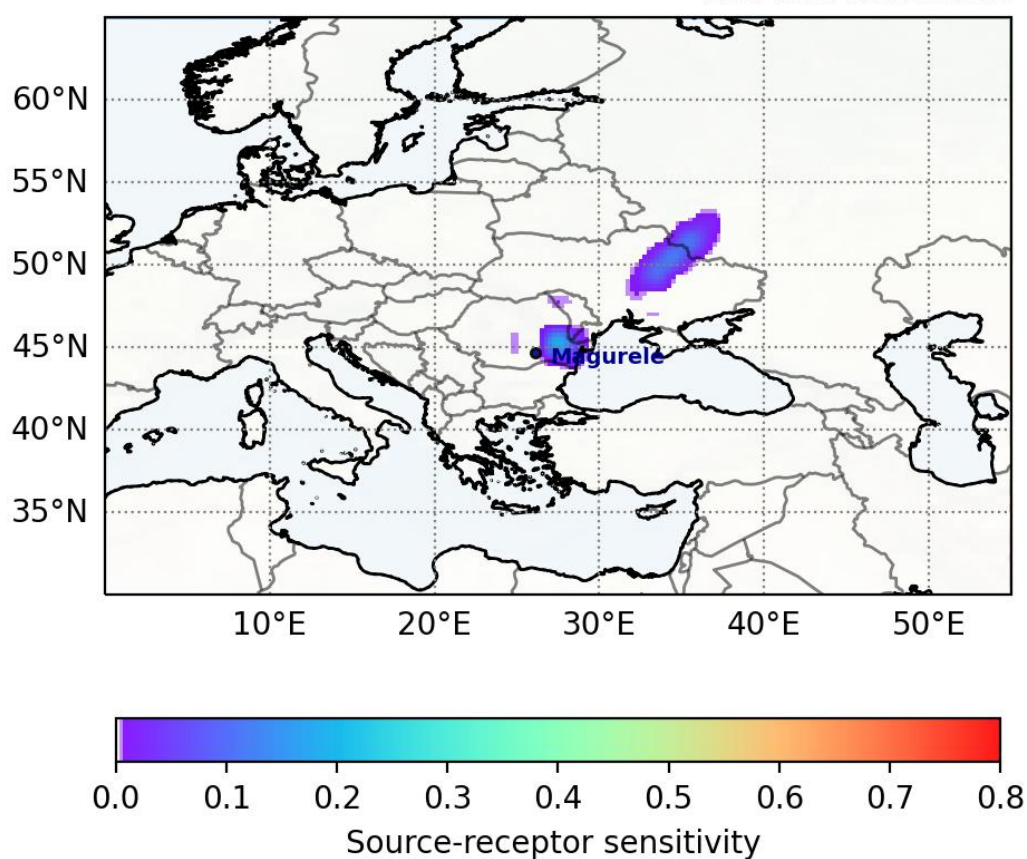

Figure S3. Case: 20140807 18:00 UTC for the layer located at 2910 m - 3390 m. (a) Ensemble and mean HYSPLIT backtrajectories; The middle plot shows the trajectories altitudes versus time. The brown dots represent the fires' locations (upper plot) and their injection height (middle plot). The lower plot shows RH for both ensemble and mean trajectories. The location of the fires is shown by bars; (b) ERA5 reanalysis and (c) FEXPART source-receptor sensitivity map.





(c)

## Biomass\_burning

valid date: 2014080719

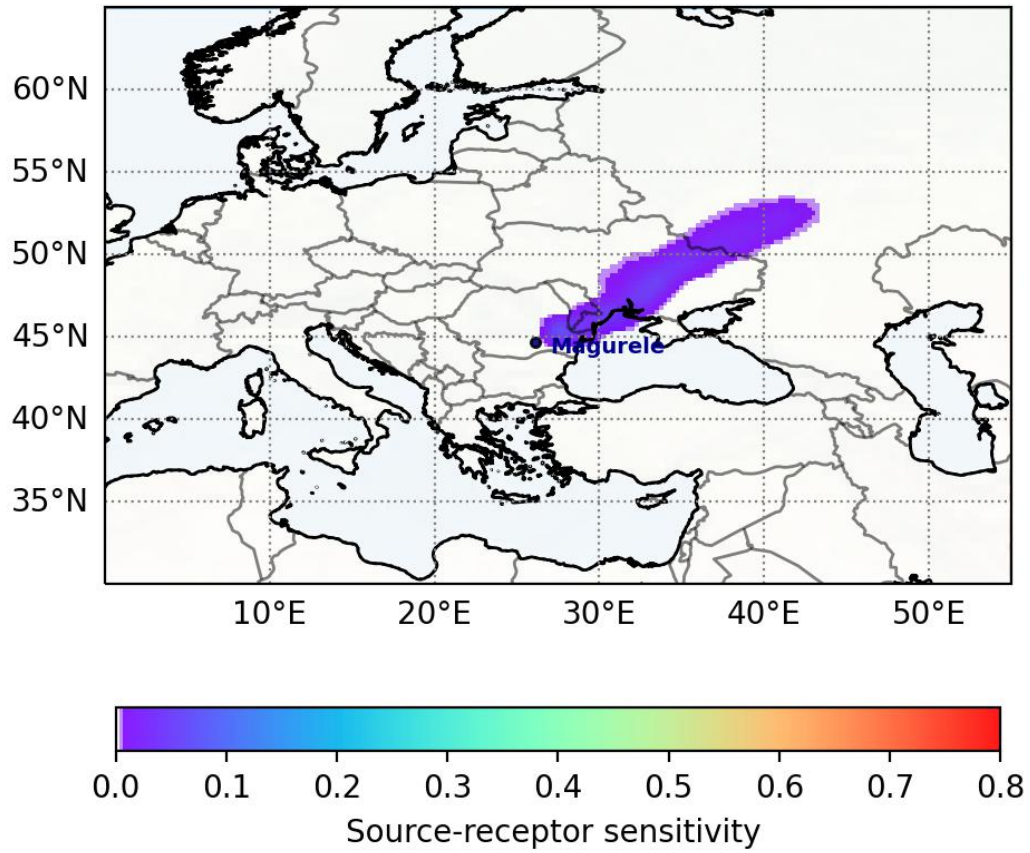

Figure S4. Case: 20140807 19:00 UTC for the layer located at 930 m - 1470 m. (a) Ensemble and mean HYSPLIT backtrajectories; The middle plot shows the trajectories altitudes versus time. The brown dots represent the fires' locations (upper plot) and their injection height (middle plot). The lower plot shows RH for both ensemble and mean trajectories. The location of the fires is shown by bars; (b) ERA5 reanalysis and (c) FEXPART source-receptor sensitivity map.

(a)

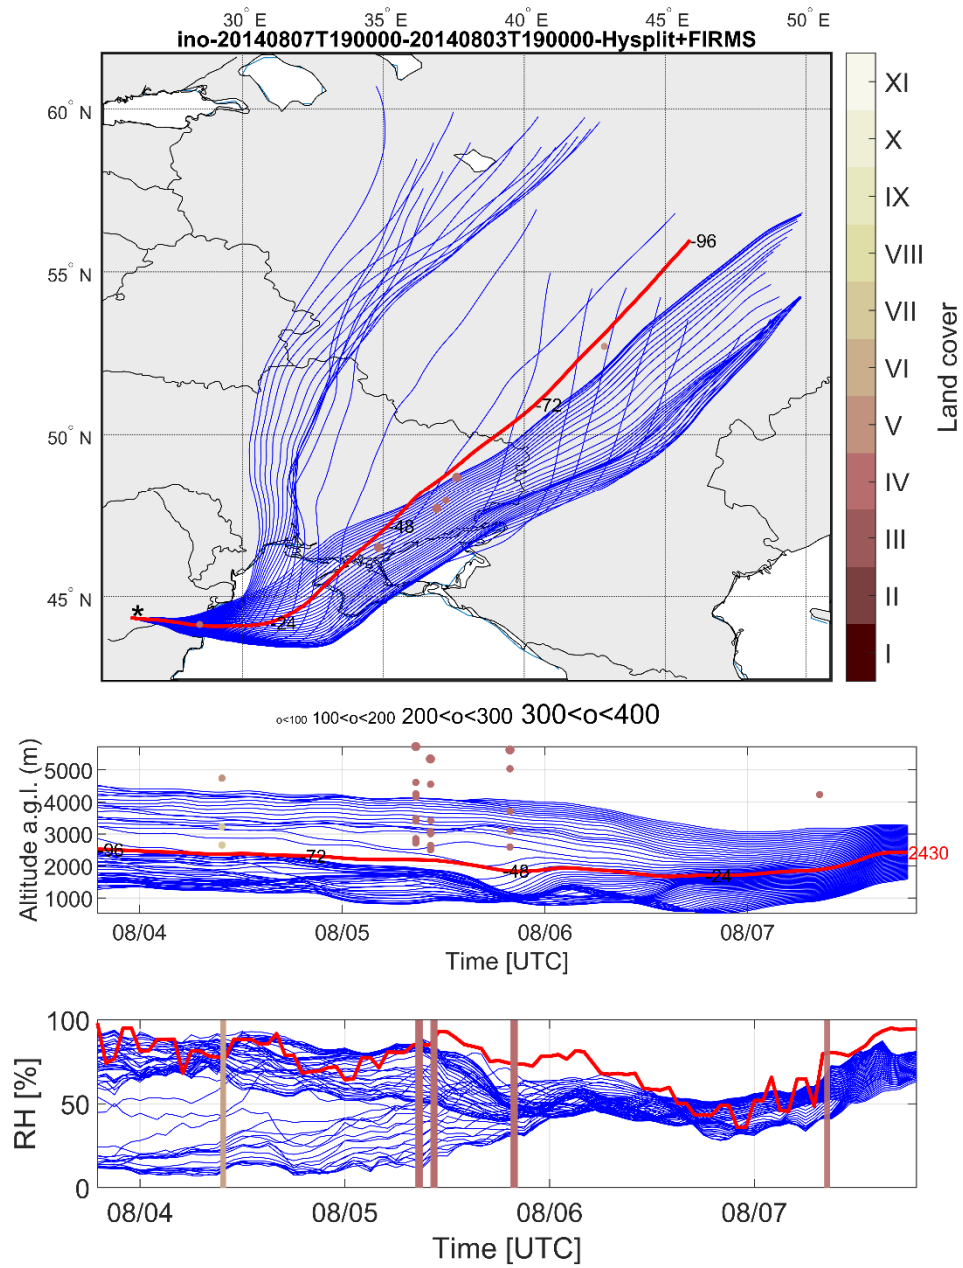

(b)

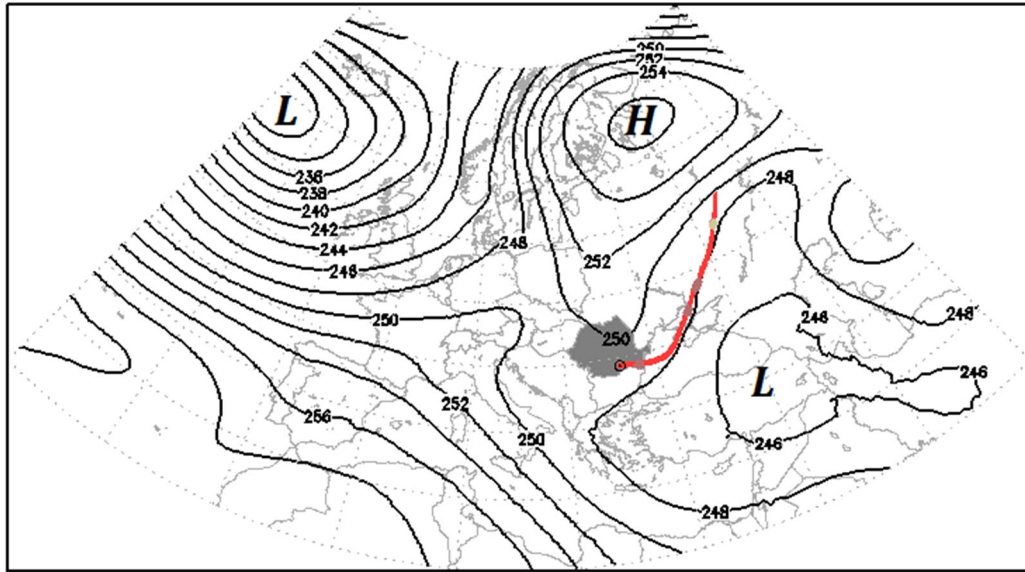

Biomass\_burning

(c)

valid date: 2014080719

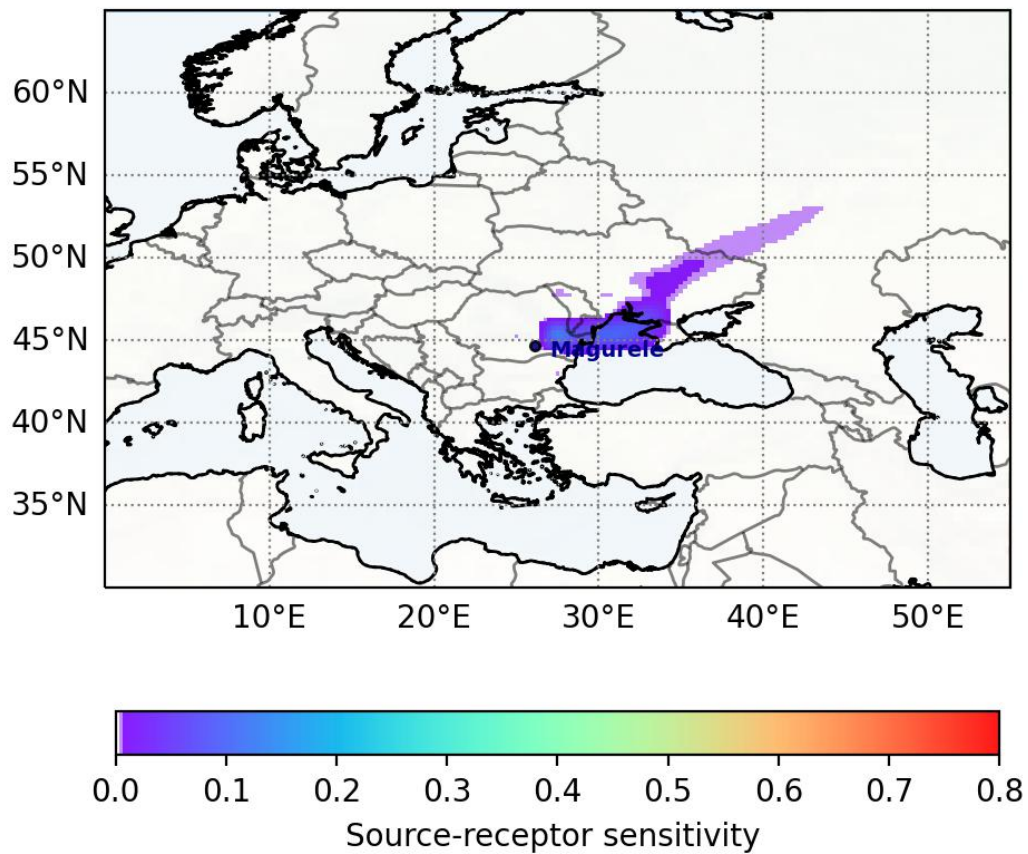

Figure S5. Case: 20140807 19:00 UTC for the layer located at 1590 m - 3270 m. (a) Ensemble and mean HYSPLIT backtrajectories; The middle plot shows the trajectories altitudes versus time. The brown dots represent the fires' locations (upper plot) and their injection height (middle plot). The lower plot shows RH for both ensemble and mean trajectories. The location of the fires is shown by bars; (b) ERA5 reanalysis and (c) FEXPART source-receptor sensitivity map.



(a)

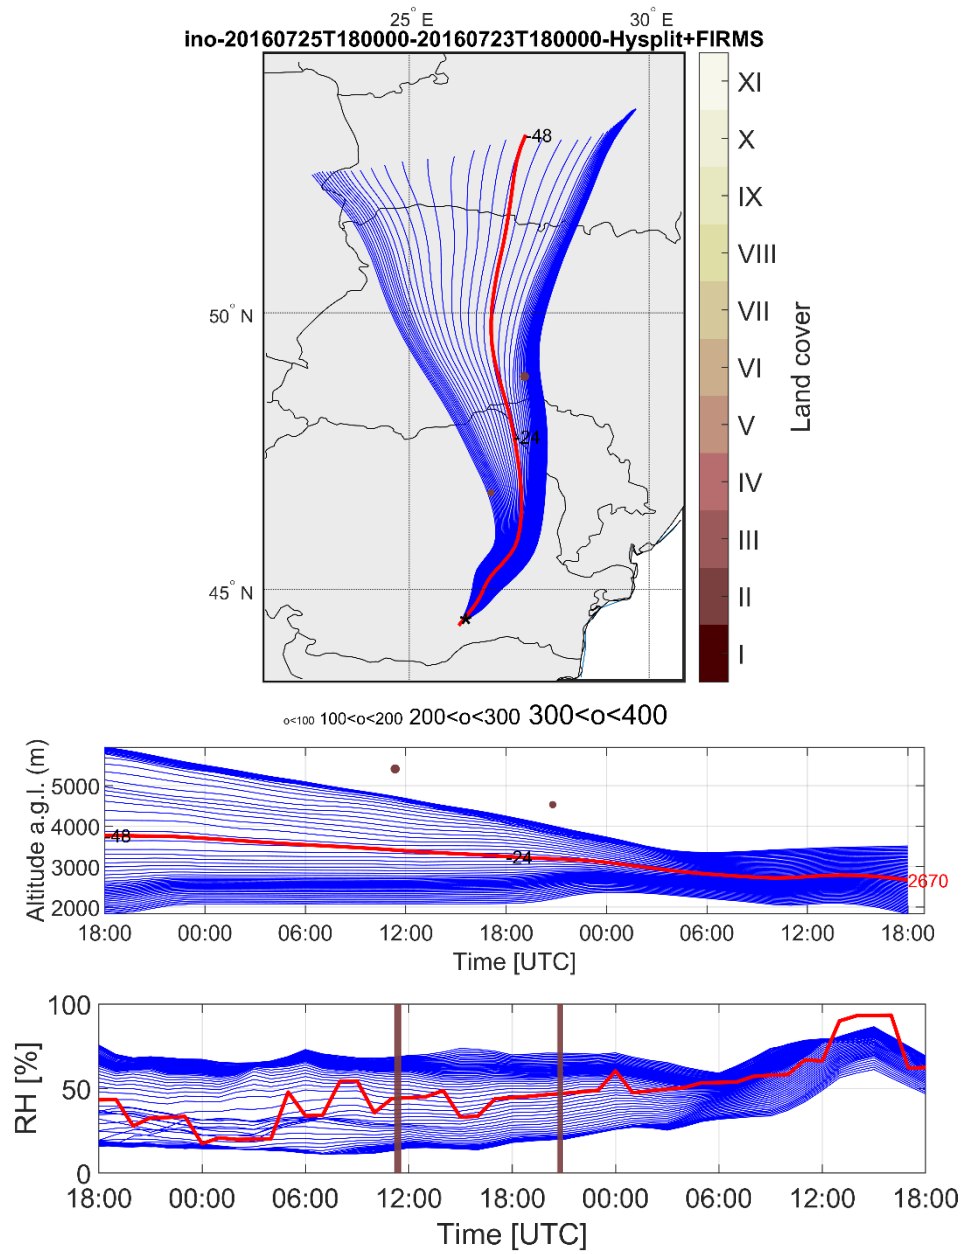

(b)

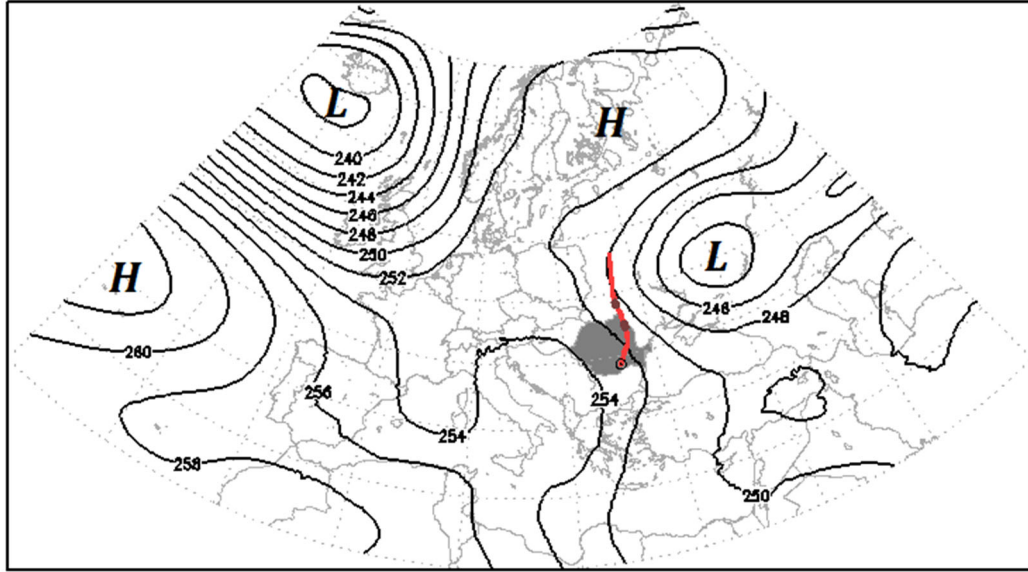

(c)

Biomass\_burning

valid date: 2016072518

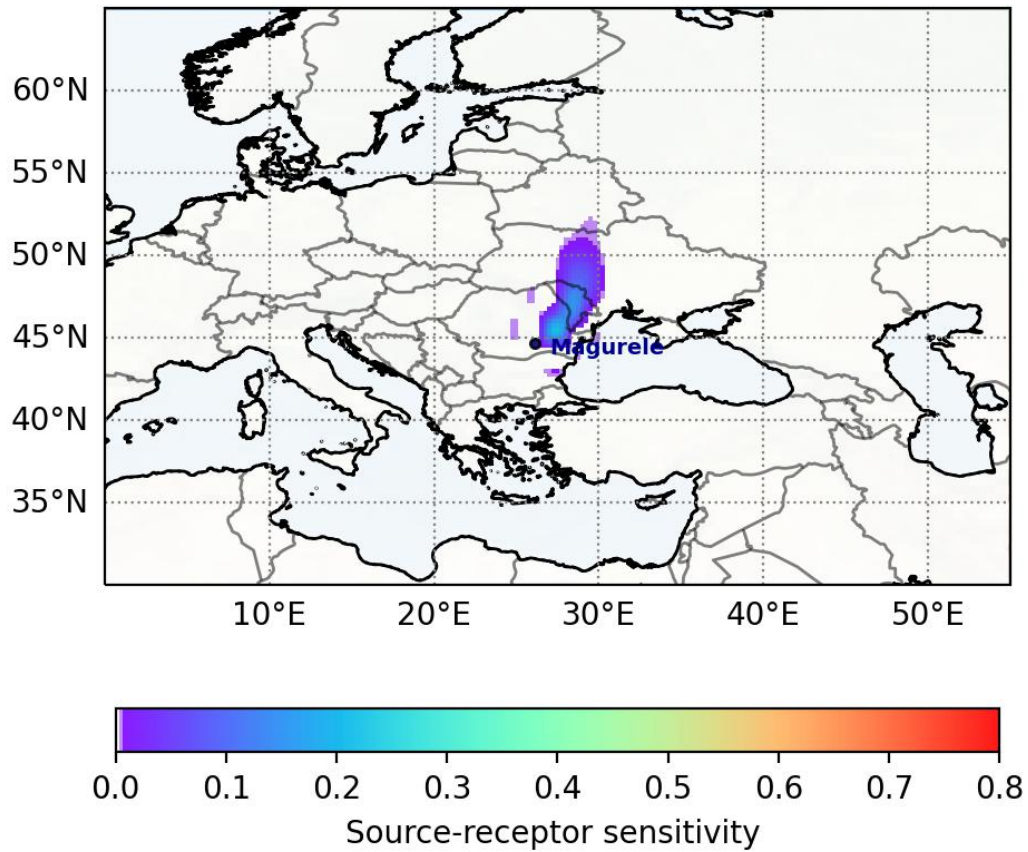

Figure S6. Case: 20160725 18:00 UTC for the layer located at 1830 m - 3510 m. (a) Ensemble and mean HYSPLIT backtrajectories; The middle plot shows the trajectories altitudes versus time. The brown dots represent the fires' locations (upper plot) and their injection height (middle plot). The lower plot shows RH for both ensemble and mean trajectories. The location of the fires is shown by bars; (b) ERA5 reanalysis and (c) FEXPART source-receptor sensitivity map.

(a)

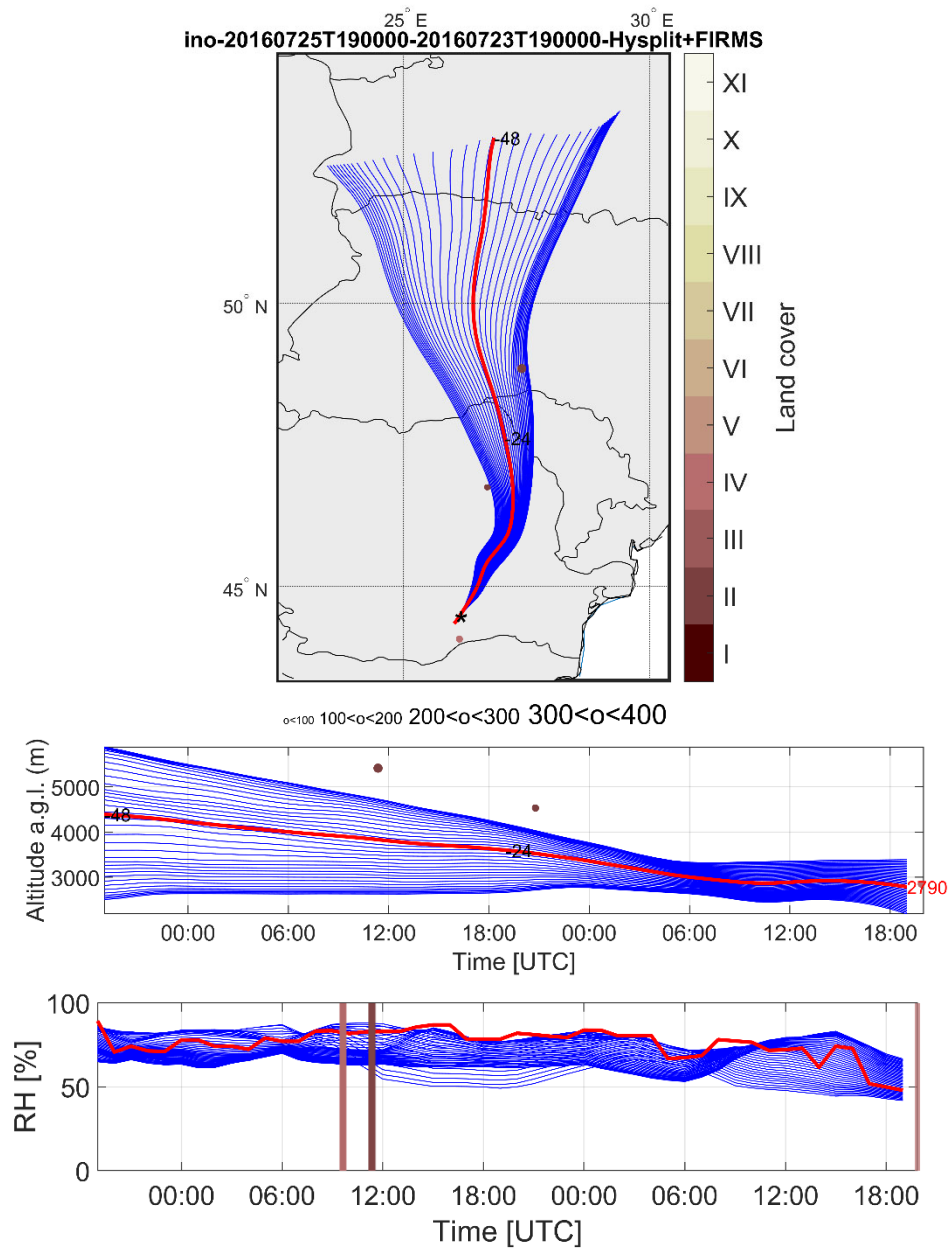

(b)

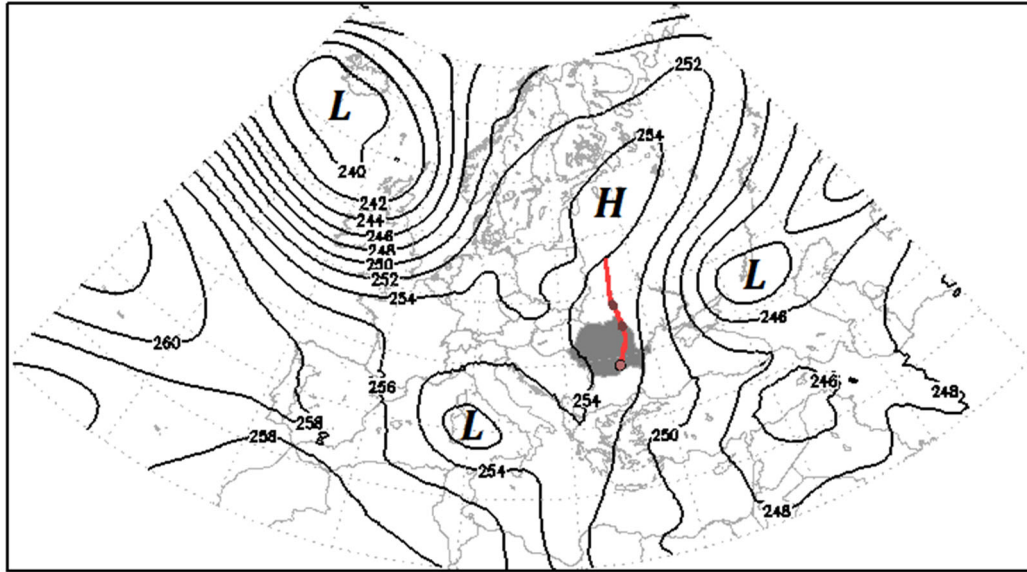

(c)

Biomass\_burning

valid date: 2016072519

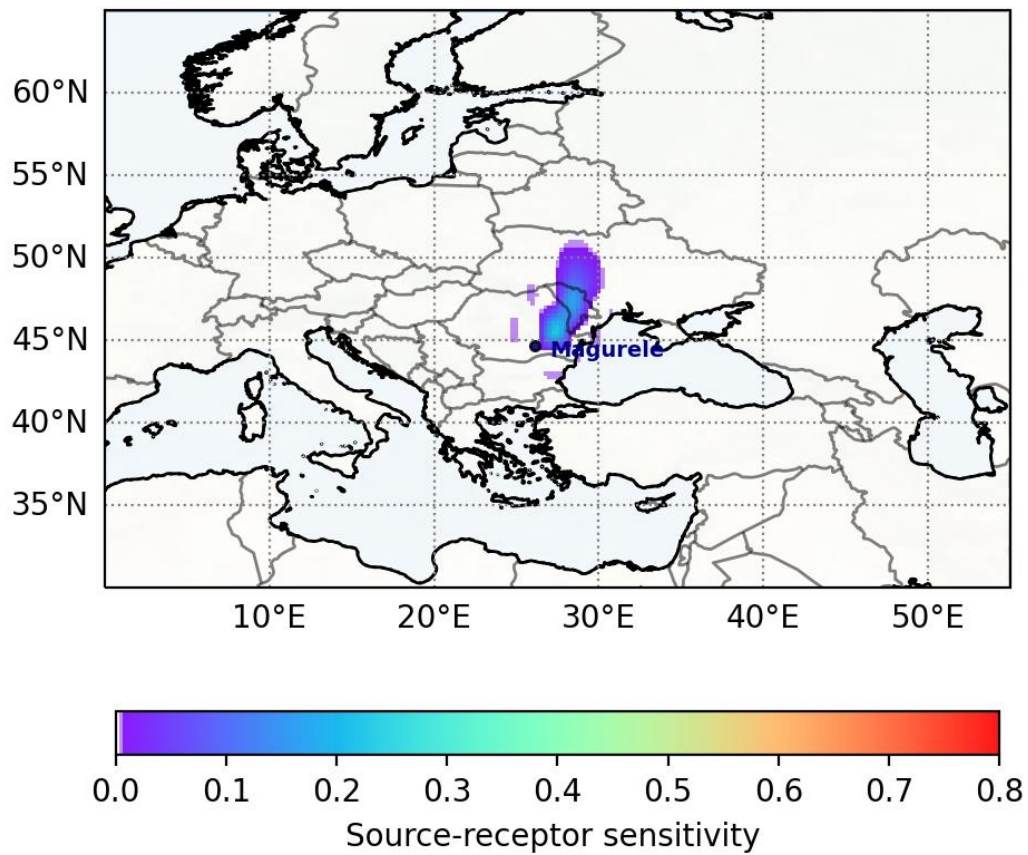

Figure S7. Case: 20160725 19:00 UTC for the layer located at 2190 m - 3390 m. (a) Ensemble and mean HYSPLIT backtrajectories; The middle plot shows the trajectories altitudes versus time. The brown dots represent the fires' locations (upper plot) and their injection height (middle plot). The lower plot shows RH for both ensemble and mean trajectories. The location of the fires is shown by bars; (b) ERA5 reanalysis and (c) FEXPART source-receptor sensitivity map.



(a)

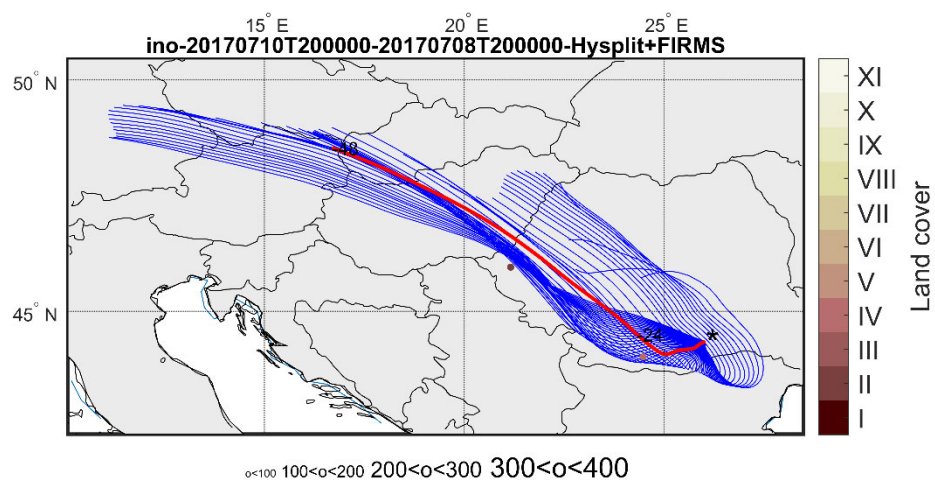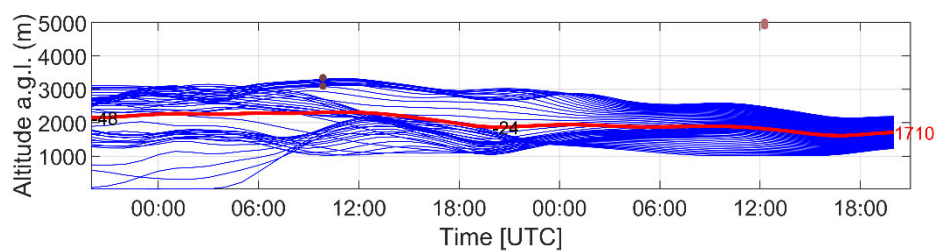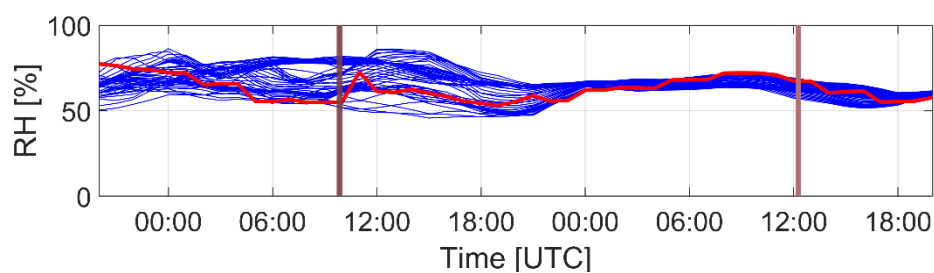

(b)

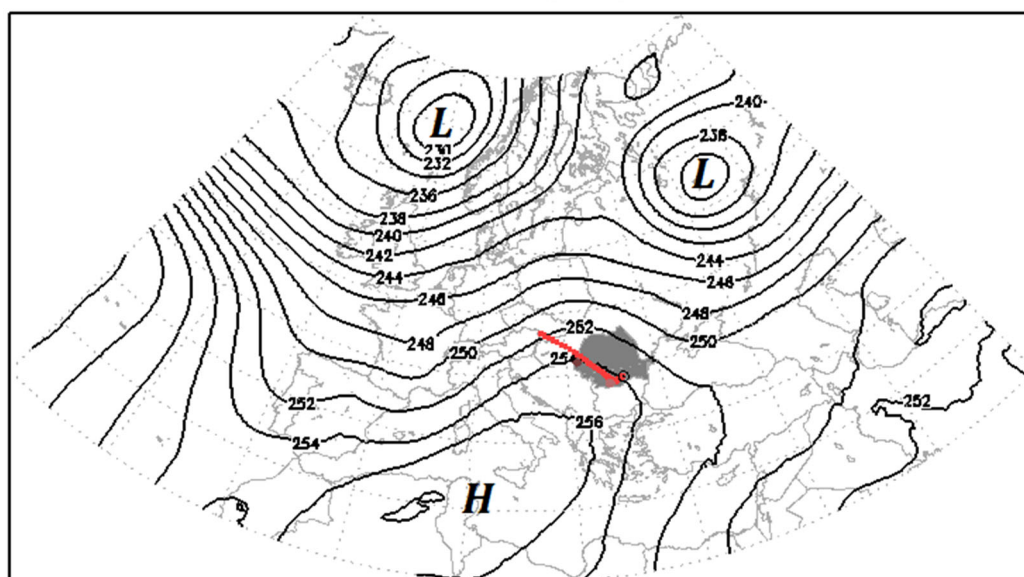

(c)

## Biomass\_burning

valid date: 2017071020

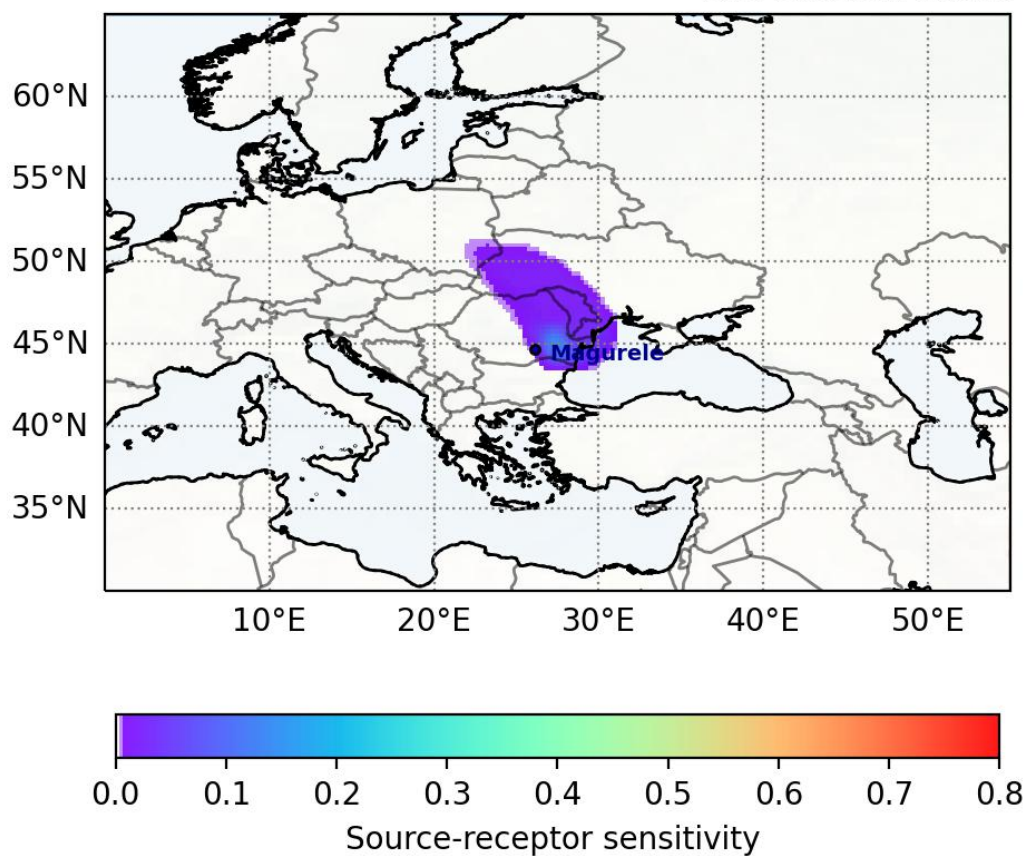

Figure S8. Case: 20170710 20:00 UTC for the layer located at 1230 m - 2190 m. (a) Ensemble and mean HYSPLIT backtrajectories; The middle plot shows the trajectories altitudes versus time. The brown dots represent the fires' locations (upper plot) and their injection height (middle plot). The lower plot shows RH for both ensemble and mean trajectories. The location of the fires is shown by bars; (b) ERA5 reanalysis and (c) FEXPART source-receptor sensitivity map.

(a)

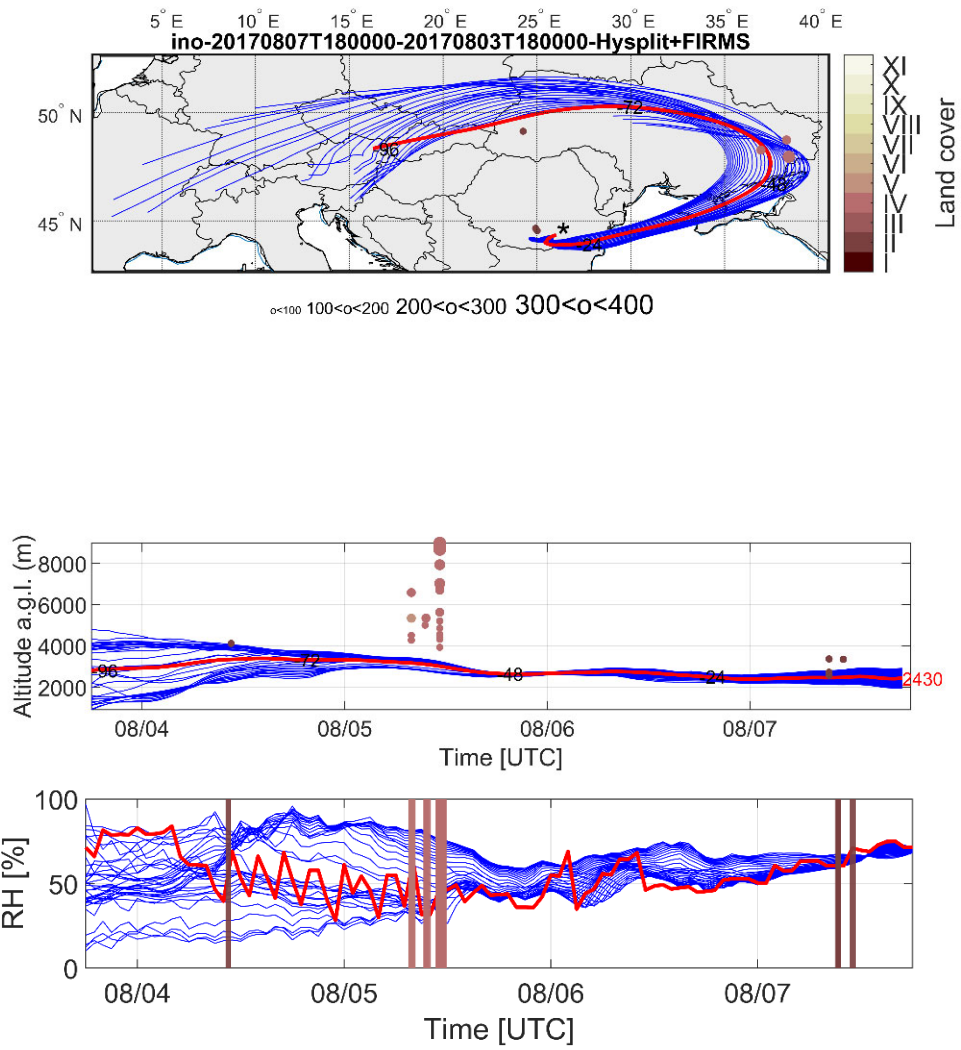

(b)

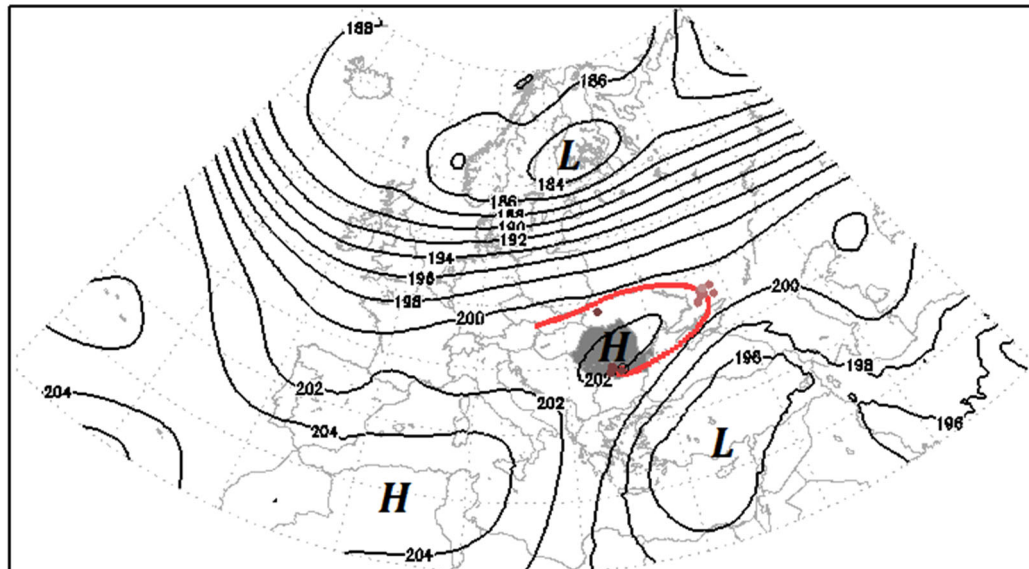



(c)

## Biomass\_burning

valid date: 2017080718

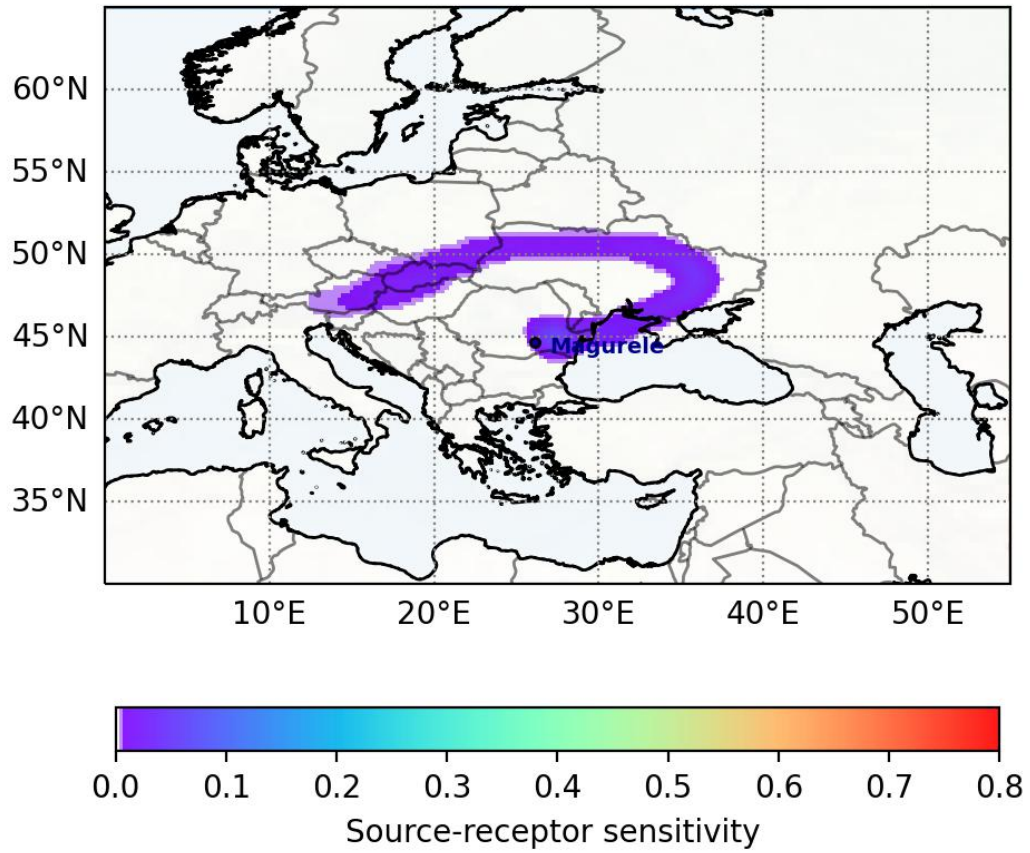

Figure S9. Case: 20170807 18:00 UTC for the layer located at 1950 m - 2910 m. (a) Ensemble and mean HYSPLIT backtrajectories; The middle plot shows the trajectories altitudes versus time. The brown dots represent the fires' locations (upper plot) and their injection height (middle plot). The lower plot shows RH for both ensemble and mean trajectories. The location of the fires is shown by bars; (b) ERA5 reanalysis and (c) FEXPART source-receptor sensitivity map.

(a)

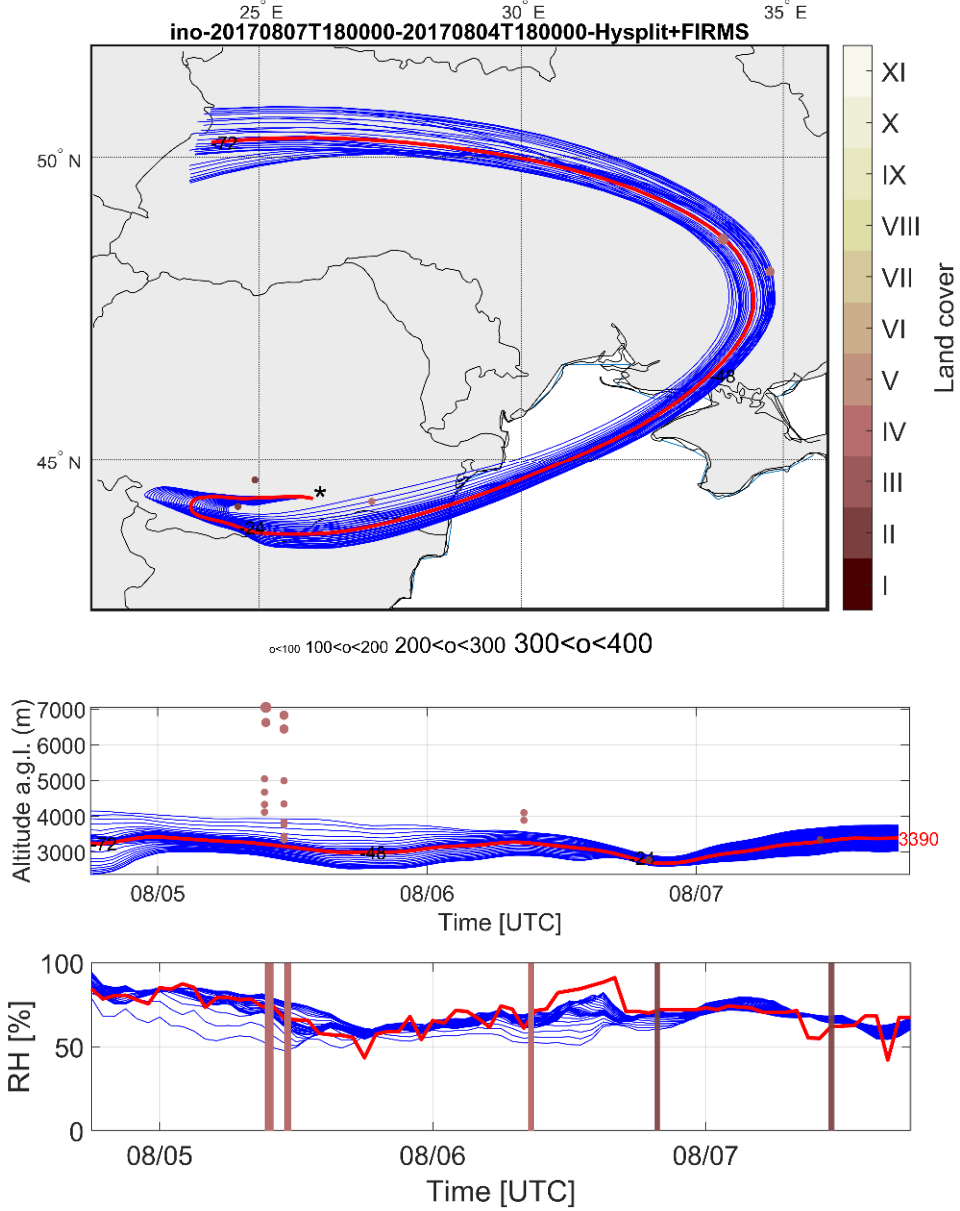

(b)

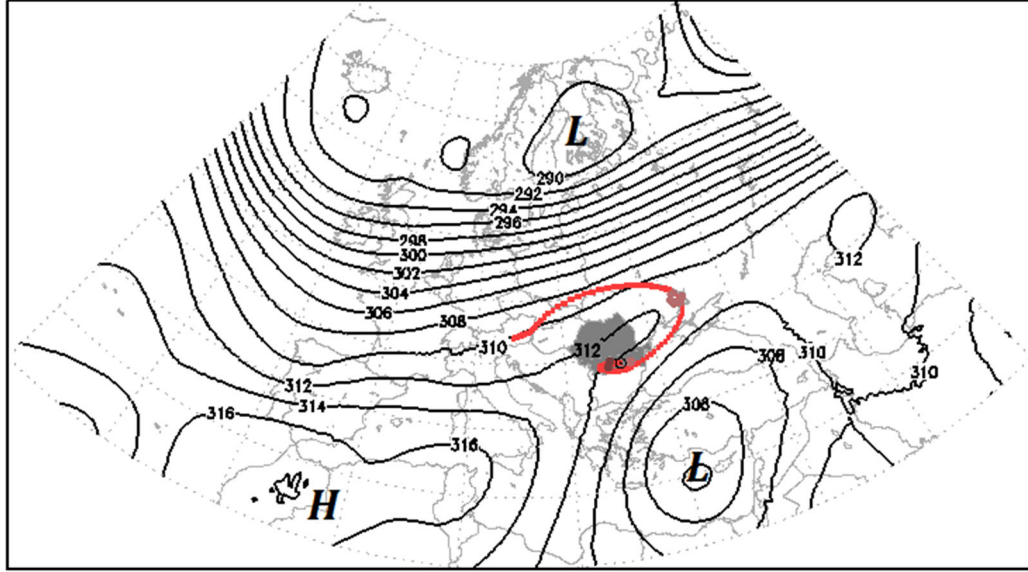

(c)

Biomass\_burning

valid date: 2017080718

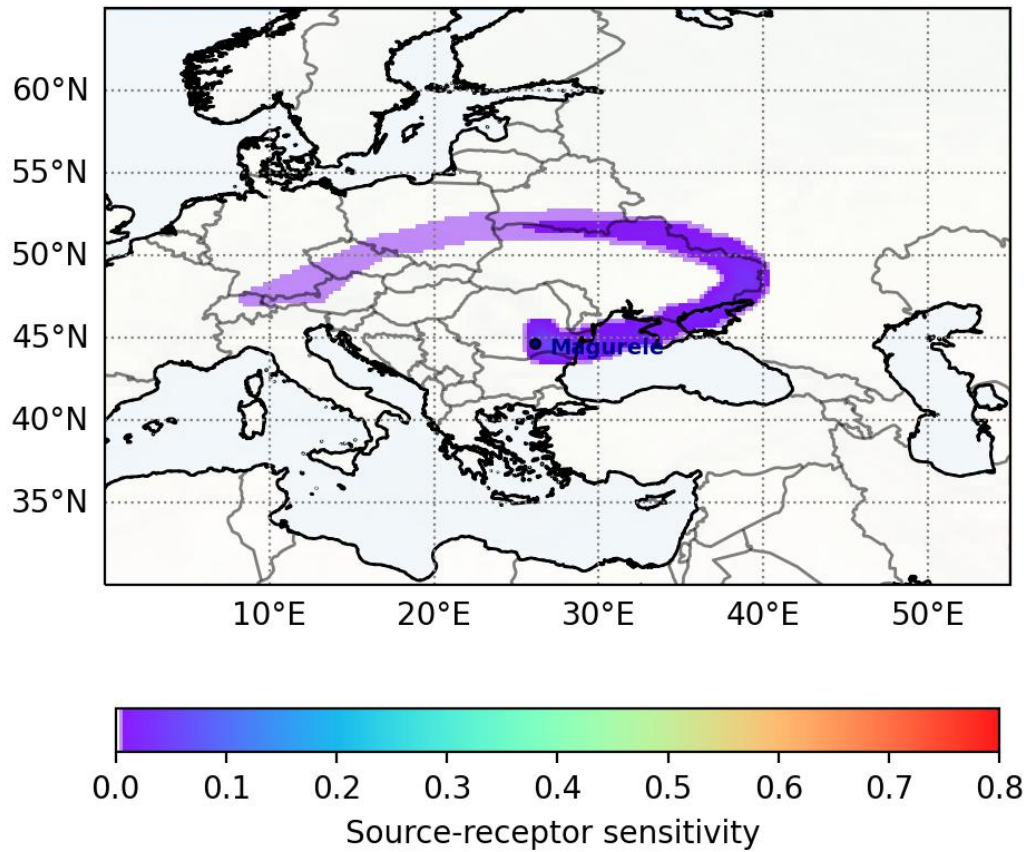

Figure S10. Case: 20170807 18:00 UTC for the layer located at 3030 m - 3750 m. (a) Ensemble and mean HYSPLIT backtrajectories; The middle plot shows the trajectories altitudes versus time. The brown dots represent the fires' locations (upper plot) and their injection height (middle plot). The lower plot shows RH for both ensemble and mean trajectories. The location of the fires is shown by bars; (b) ERA5 reanalysis and (c) FEXPART source-receptor sensitivity map.

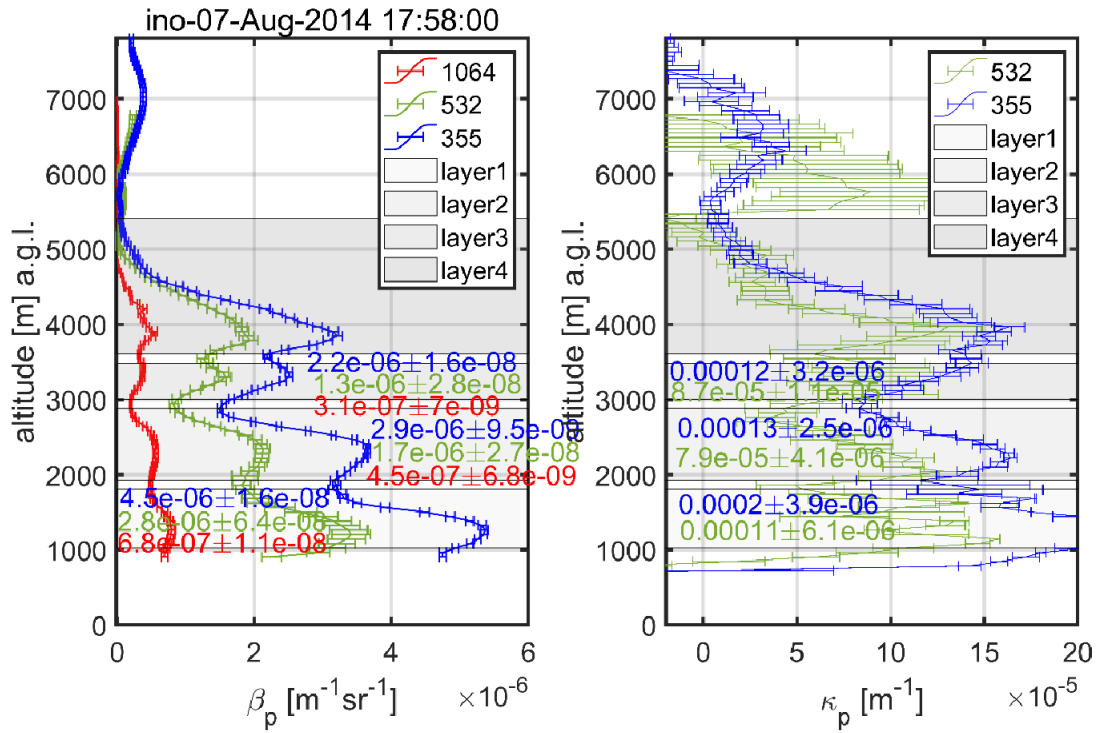

Figure S11. Lidar averaged profiles over 17:45 – 18:11 UTC on 7 August 2014: aerosol backscatter coefficient at 355 nm, 532 nm and 1064 nm (left) and aerosol extinction coefficient at 355 nm and 532 nm (right). The layers are marked (gray shaded) while the mean values of the optical properties in the layer are shown with the corresponding color for each parameter. The first three layers are analyzed. The corresponding backtrajectories for the three layers are shown in Figures S1-S3.

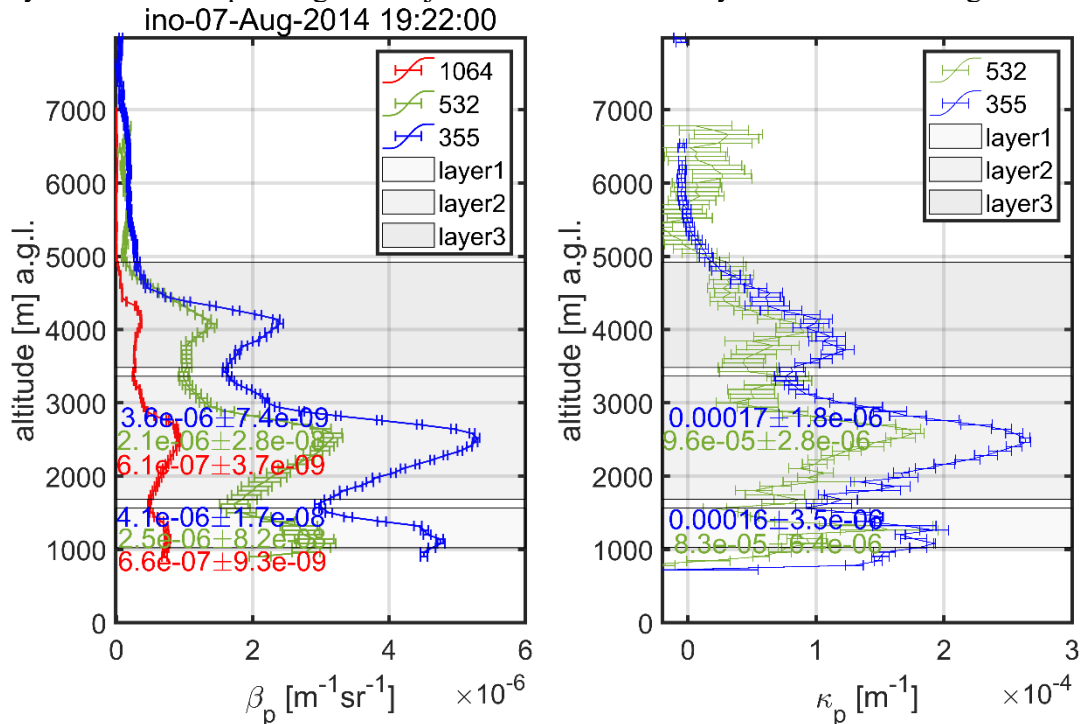

Figure S12. Lidar averaged profiles over 19:07 – 19:37 UTC on 7 August 2014: aerosol backscatter coefficient at 355 nm, 532 nm and 1064 nm (left) and aerosol extinction coefficient at 355 nm and 532 nm (right). The layers are marked (gray shaded) while the mean values of the optical properties in the layer are shown with the corresponding color for each parameter. The first two layers are analyzed. The corresponding backtrajectories for the two layers are shown in Figures S4-S5.

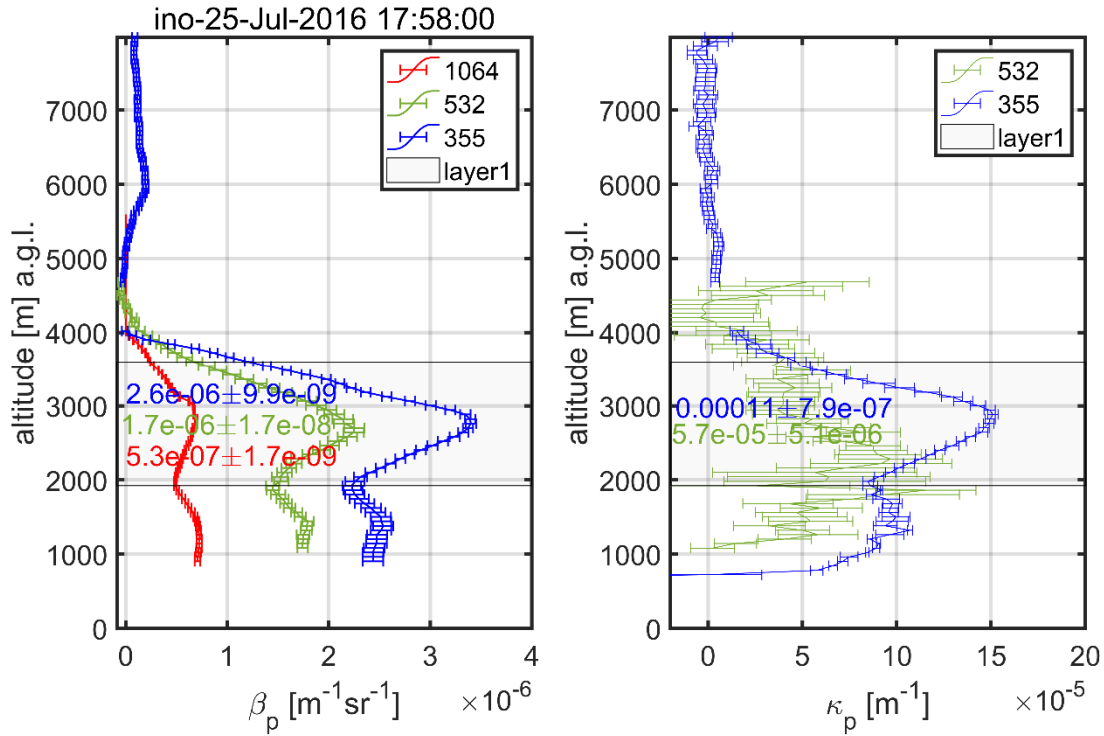

Figure S13. Lidar averaged profiles over 17:28 – 18:28 UTC on 25 July 2016: aerosol backscatter coefficient at 355 nm, 532 nm and 1064 nm (left) and aerosol extinction coefficient at 355 nm and 532 nm (right). The layer is marked (gray shaded) while the mean values of the optical properties in the layer are shown with the corresponding color for each parameter. The corresponding backtrajectory for the layer is shown in Figure S6.

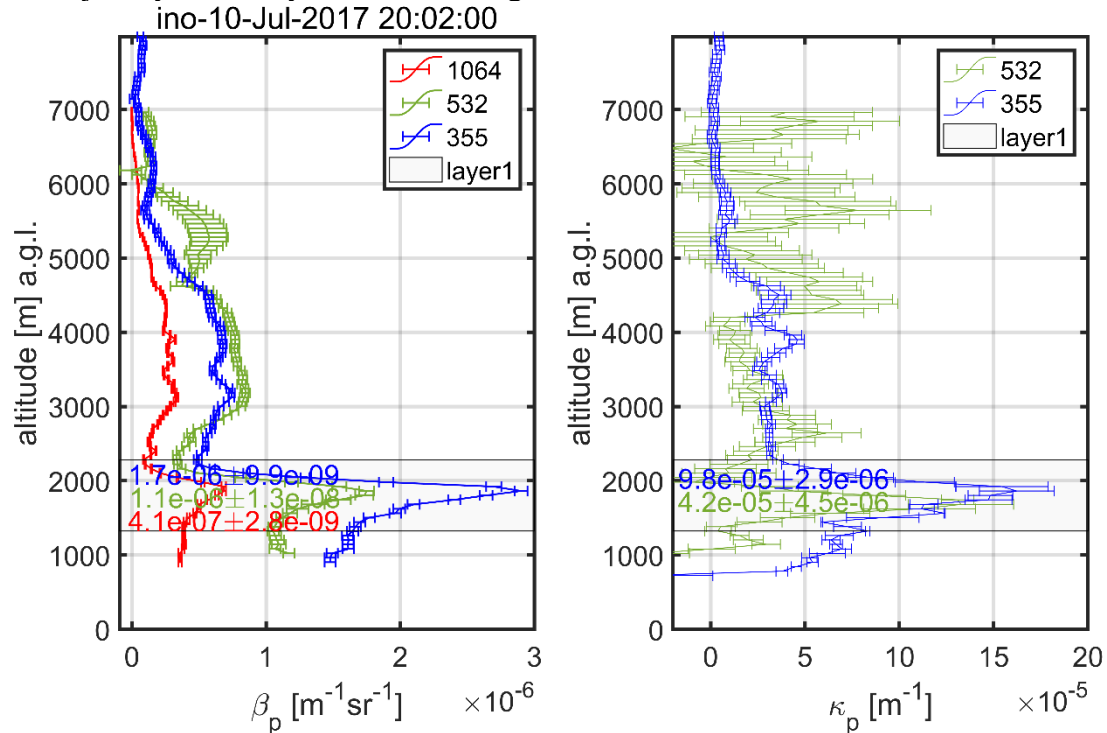

Figure S14. Lidar averaged profiles over 19:55 – 20:09 UTC on 10 July 2017: aerosol backscatter coefficient at 355 nm, 532 nm and 1064 nm (left) and aerosol extinction coefficient at 355 nm and 532 nm (right). The layer is marked (gray shaded) while the mean values of the optical properties in the layer are shown with the corresponding color for each parameter. The corresponding backtrajectory for the layer is shown in Figure S8.

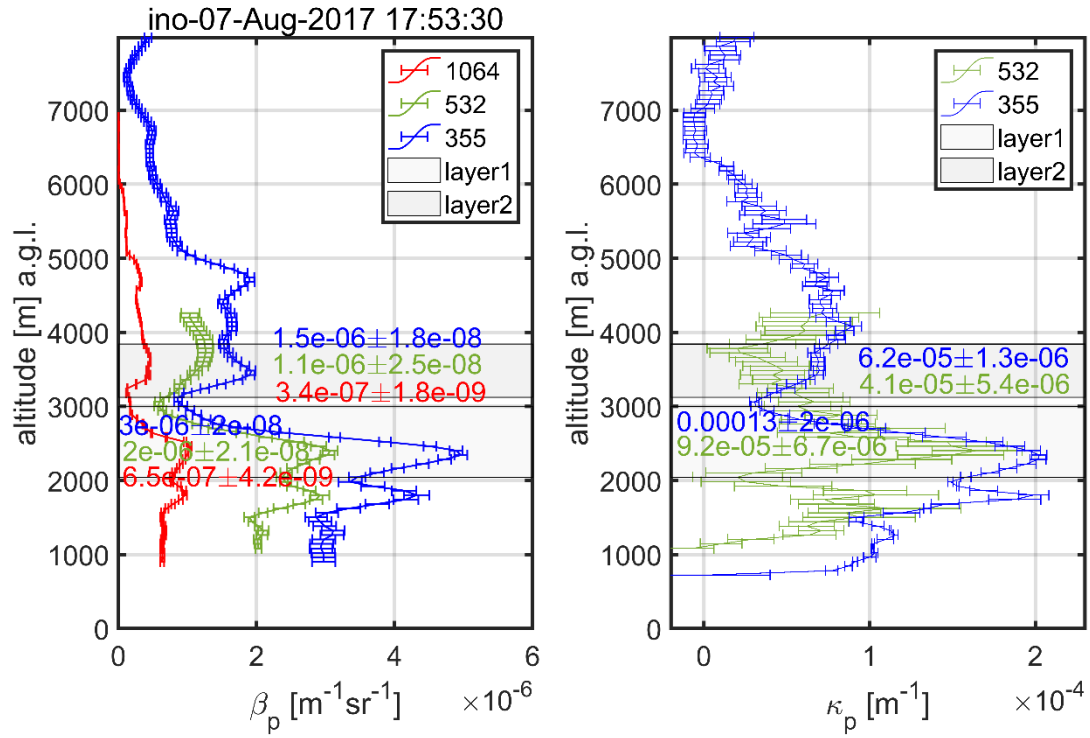

Figure S15. Lidar averaged profiles over 17:26 – 18:21 UTC on 7 August 2017: aerosol backscatter coefficient at 355 nm, 532 nm and 1064 nm (left) and aerosol extinction coefficient at 355 nm and 532 nm (right). The layers are marked (gray shaded) while the mean values of the optical properties in the layer are shown with the corresponding color for each parameter. The corresponding backtrajectories for the two layers are shown in Figures S9-S10.
